# Supplementary material
Source: Research Square preprint supplement (doi:10.21203/rs.3.rs-9889835/v1)
Supplement: Supplementary file 1 [file 46eacbdc0fe16e147bfce5e6.docx]

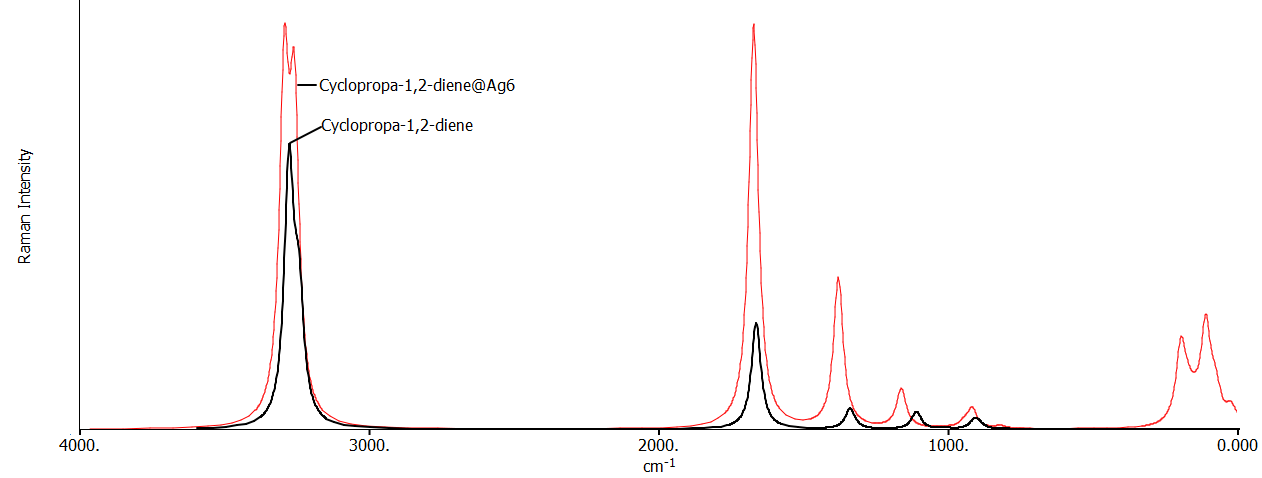


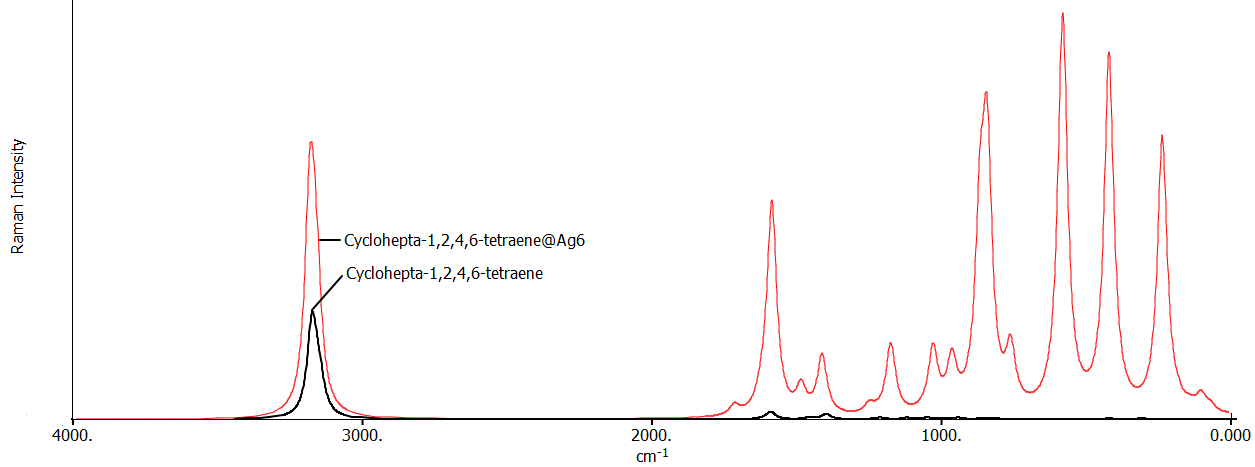


This graphical abstract illustrates how adsorption onto Ag₆ clusters enhances aromaticity in π‑systems, leading to stronger aromatic stabilization and amplified surface‑enhanced Raman scattering (SERS) signals.
