# Supplementary material
Source: Research Square preprint supplement (doi:10.21203/rs.3.rs-9889835/v1)
Supplement: Supplementary file 2 [file 885038fb4569b3b70b67deb3.docx]

- Ag₆ adsorption converts weakly aromatic π-systems into electronically delocalized, highly polarizable adsorbates.
- Frontier orbital gap collapse and electrophilicity enhancement activate efficient π–Ag charge-transfer channels.
- QTAIM descriptors identify mixed closed-shell/partial-covalent bonding at the molecule–Ag₆ interface.
- Metal-induced bond equalization markedly reinforces aromaticity, as quantified by HOMA, ΔBL, and entropy metrics.
- Aromaticity enhancement emerges as a quantitative descriptor of chemical SERS intensity amplification.
